# Supplementary material
Source: PubMed Central journal article supplement (PMC4586249)
Supplement: NIHMS626937-supplement-supp_Table_I.pdf [file NIHMS626937-supplement-supp_Table_I.pdf]

**Supplemental Table 1.** Features of patients and mice with RecQ deficiencies

| <u>BLM helicase</u>                                       | <u>WRN helicase</u>                 | <u>RECQL4 helicase</u>                 |                                          |                                       |
|-----------------------------------------------------------|-------------------------------------|----------------------------------------|------------------------------------------|---------------------------------------|
| Bloom syndrome                                            | Werner syndrome                     | Rothmund-<br>Thomson<br>syndrome       | Baller-Gerold<br>syndrome                | RAPADILINO<br>syndrome                |
| Short stature, skeletal abnormalities                     | Short stature, thin limbs           | Short stature, skeletal abnormalities  | Skeletal abnormalities, craniosynostosis | Short stature, skeletal abnormalities |
| Cancer: normal distribution and type                      | Cancer: sarcomas, mesenchymal       | Cancer: osteosarcoma; lymphoma         | Cancer: lymphoma                         | Cancer: osteosarcoma                  |
| Skin pigmentation changes: redness, dilated blood vessels | Skin changes: loss of fat, wrinkles | Skin pigmentation change: poikiloderma | Skin pigmentation change: poikiloderma   | Cleft or arched palate                |
| Mental retardation                                        | Premature graying/loss of hair      | Sparse hair                            |                                          | Normal intelligence                   |
| Immune deficiency                                         | Osteoporosis                        | Dental and nail changes                |                                          | Diarrhea                              |
| Type II diabetes                                          | Type II diabetes                    |                                        |                                          |                                       |
| Male infertility; female subfertility                     | Bilateral cataracts                 |                                        |                                          |                                       |
|                                                           | Atherosclerosis                     |                                        |                                          |                                       |

**Mouse models of RecQ helicases**

| Recq1      | Blm                                       | Wrn                                             | Recq4                                                  | Recq5             |
|------------|-------------------------------------------|-------------------------------------------------|--------------------------------------------------------|-------------------|
| KO: normal | KO: <b>lethal</b><br>Cond.: <b>cancer</b> | KO: ~normal<br>+Terc <sup>-</sup> : <b>aged</b> | KO: <b>lethal</b><br>+APC <sup>m</sup> : <b>cancer</b> | KO: <b>cancer</b> |

The human disease phenotypes were compiled from GeneReviews of BLM (1), WRN (2), and RECQL4 (3, 4). Knockout (KO) mouse model data were collected from Recq1 (5), Blm (6-9), Wrn (10-12), Recq4 (13, 14), and Recq5 (15). Abbreviations: Cond., conditional expression; Terc, RNA component of telomerase; APC, anaphase promoting complex.

## References

1. Sanz MM, German J. 2006-2013. Bloom's Syndrome. In *GeneReviews at GeneTests: Medical Genetics Information Resource [database online]*. ed. RA Pagon, MP Adam, TD Bird, CR Dolan, CT Fong, K Stephens. Seattle (WA): University of Washington, Seattle
2. Oshima J, Martin GM, Hisama FM. 2002-2012. Werner Syndrome. In *GeneReviews at GeneTests: Medical Genetics Information Resource [database online]*. ed. RA Pagon, MP Adam, TD Bird, CR Dolan, CT Fong, K Stephens. Seattle (WA): University of Washington, Seattle
3. Van Maldergem L. 1993-2013. Baller-Gerold Syndrome., ed. RA Pagon, MP Adam, TD Bird, CR Dolan, CT Fong, K Stephens. GeneReviews at GeneTests: Medical Genetics Information Resource [database online]. Seattle (WA): University of Washington, Seattle
4. Wang LL, Plon SE. 1999-2013. Rothmund-Thomson Syndrome. ed. RA Pagon, MP Adam, TD Bird, CR Dolan, CT Fong, K Stephens. GeneReviews at GeneTests: Medical Genetics Information Resource [database online]. Seattle (WA): University of Washington, Seattle
5. Sharma S, Stumpo DJ, Balajee AS, Bock CB, Lansdorp PM, et al. 2007. RECQL, a member of the RecQ family of DNA helicases, suppresses chromosomal instability. *Mol Cell Biol* 27: 1784-94
6. Chester N, Kuo F, Kozak C, O'Hara CD, Leder P. 1998. Stage-specific apoptosis, developmental delay, and embryonic lethality in mice homozygous for a targeted disruption in the murine Bloom's syndrome gene. *Genes Dev* 12: 3382-93
7. Luo G, Santoro IM, McDaniel LD, Nishijima I, Mills M, et al. 2000. Cancer predisposition caused by elevated mitotic recombination in Bloom mice. *Nat Genet* 26: 424-9
8. McDaniel LD, Chester N, Watson M, Borowsky AD, Leder P, Schultz RA. 2003. Chromosome instability and tumor predisposition inversely correlate with BLM protein levels. *DNA Repair (Amst)* 2: 1387-404
9. Chester N, Babbe H, Pinkas J, Manning C, Leder P. 2006. Mutation of the murine Bloom's syndrome gene produces global genome destabilization. *Mol Cell Biol* 26: 6713-26
10. Lombard DB, Beard C, Johnson B, Marciniak RA, Dausman J, et al. 2000. Mutations in the WRN gene in mice accelerate mortality in a p53-null background. *Mol Cell Biol* 20: 3286-91
11. Du X, Shen J, Kugan N, Furth EE, Lombard DB, et al. 2004. Telomere shortening exposes functions for the mouse Werner and Bloom syndrome genes. *Mol Cell Biol* 24: 8437-46
12. Chang S, Multani AS, Cabrera NG, Naylor ML, Laud P, et al. 2004. Essential role of limiting telomeres in the pathogenesis of Werner syndrome. *Nat Genet* 36: 877-82
13. Ichikawa K, Noda T, Furuichi Y. 2002. [Preparation of the gene targeted knockout mice for human premature aging diseases, Werner syndrome, and Rothmund-Thomson syndrome caused by the mutation of DNA helicases]. *Nihon Yakurigaku Zasshi* 119: 219-26
14. Mann MB, Hodges CA, Barnes E, Vogel H, Hassold TJ, Luo G. 2005. Defective sister-chromatid cohesion, aneuploidy and cancer predisposition in a mouse model of type II Rothmund-Thomson syndrome. *Hum Mol Genet* 14: 813-25
15. Hu Y, Raynard S, Sehorn MG, Lu X, Bussen W, et al. 2007. RECQL5/Recql5 helicase regulates homologous recombination and suppresses tumor formation via disruption of Rad51 presynaptic filaments. *Genes Dev* 21: 3073-84
